# Supplementary material for: Inferring and perturbing cell fate regulomes in human brain organoids
Source: PubMed Central journal article supplement (PMC10499607; doi:10.1038/s41586-022-05279-8), 2022-10-05
Supplement: 41586_2022_5279_MOESM1_ESM.pdf [file 41586_2022_5279_MOESM1_ESM.pdf]

---

**Supplementary information**

---

**Inferring and perturbing cell fate regulomes  
in human brain organoids**

---

In the format provided by the  
authors and unedited

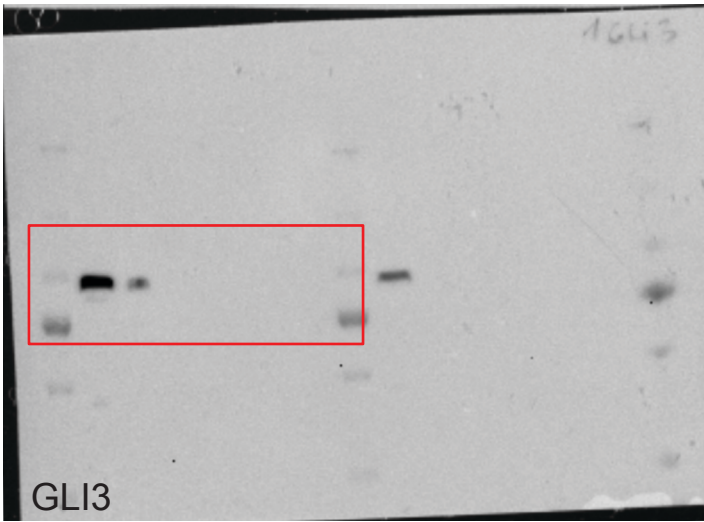

250 kDa  
130 kDa  
100 kDa  
70 kDa  
55 kDa  
35 kDa

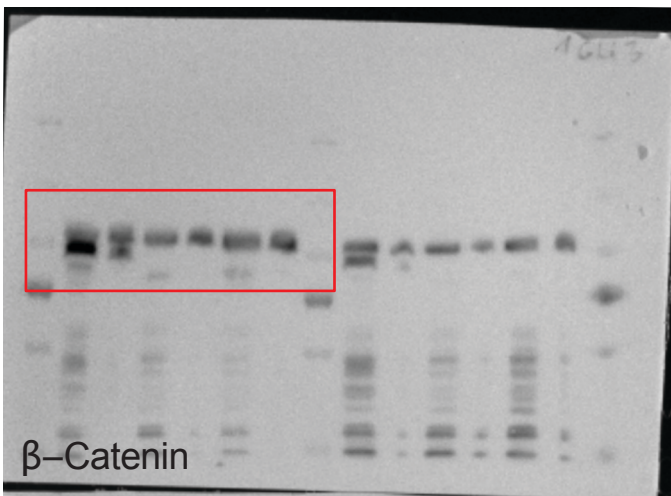

250 kDa  
130 kDa  
100 kDa  
70 kDa  
55 kDa  
35 kDa

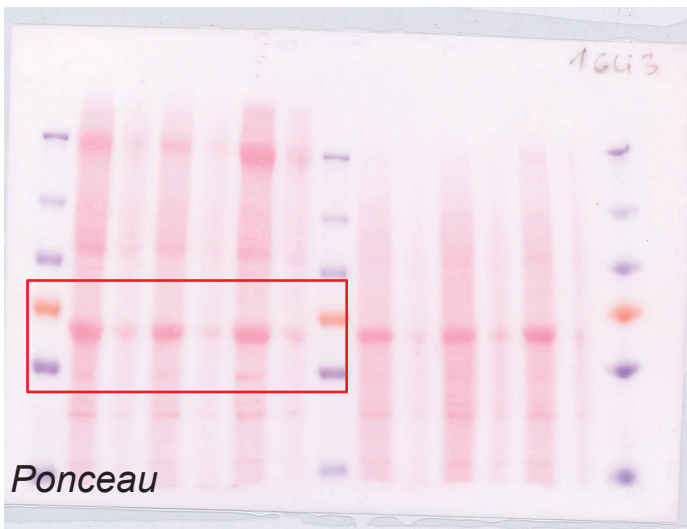

250 kDa  
130 kDa  
100 kDa  
70 kDa  
55 kDa  
35 kDa
