# Supplementary material for: Inferring and perturbing cell fate regulomes in human brain organoids
Source: PubMed Central journal article supplement (PMC10499607; doi:10.1038/s41586-022-05279-8), 2022-10-05
Supplement: 41586_2022_5279_MOESM2_ESM.pdf [file 41586_2022_5279_MOESM2_ESM.pdf]

## Reporting Summary

Nature Portfolio wishes to improve the reproducibility of the work that we publish. This form provides structure for consistency and transparency in reporting. For further information on Nature Portfolio policies, see our [Editorial Policies](#) and the [Editorial Policy Checklist](#).

### Statistics

For all statistical analyses, confirm that the following items are present in the figure legend, table legend, main text, or Methods section.

n/a Confirmed

- The exact sample size ( $n$ ) for each experimental group/condition, given as a discrete number and unit of measurement
- A statement on whether measurements were taken from distinct samples or whether the same sample was measured repeatedly
- The statistical test(s) used AND whether they are one- or two-sided  
*Only common tests should be described solely by name; describe more complex techniques in the Methods section.*
- A description of all covariates tested
- A description of any assumptions or corrections, such as tests of normality and adjustment for multiple comparisons
- A full description of the statistical parameters including central tendency (e.g. means) or other basic estimates (e.g. regression coefficient) AND variation (e.g. standard deviation) or associated estimates of uncertainty (e.g. confidence intervals)
- For null hypothesis testing, the test statistic (e.g.  $F$ ,  $t$ ,  $r$ ) with confidence intervals, effect sizes, degrees of freedom and  $P$  value noted  
*Give  $P$  values as exact values whenever suitable.*
- For Bayesian analysis, information on the choice of priors and Markov chain Monte Carlo settings
- For hierarchical and complex designs, identification of the appropriate level for tests and full reporting of outcomes
- Estimates of effect sizes (e.g. Cohen's  $d$ , Pearson's  $r$ ), indicating how they were calculated

*Our web collection on [statistics for biologists](#) contains articles on many of the points above.*

### Software and code

Policy information about [availability of computer code](#)

Data collection See Methods. All codes are available upon request.

Data analysis See Methods. The Pando R package is available on GitHub (<https://github.com/quadbiolab/Pando>). Other custom code used in the analyses is deposited on GitHub ([https://github.com/quadbiolab/organoid\\_regulomes](https://github.com/quadbiolab/organoid_regulomes)).

For manuscripts utilizing custom algorithms or software that are central to the research but not yet described in published literature, software must be made available to editors and reviewers. We strongly encourage code deposition in a community repository (e.g. GitHub). See the Nature Portfolio [guidelines for submitting code & software](#) for further information.

### Data

Policy information about [availability of data](#)

All manuscripts must include a [data availability statement](#). This statement should provide the following information, where applicable:

- Accession codes, unique identifiers, or web links for publicly available datasets
- A description of any restrictions on data availability
- For clinical datasets or third party data, please ensure that the statement adheres to our [policy](#)

Raw sequencing data will be deposited into ArrayExpress. Processed data and the VCF files for demultiplexing are deposited on Zenodo (<https://doi.org/10.5281/zenodo.5242913>).

## Field-specific reporting

Please select the one below that is the best fit for your research. If you are not sure, read the appropriate sections before making your selection.

Life sciences       Behavioural & social sciences       Ecological, evolutionary & environmental sciences

For a reference copy of the document with all sections, see [nature.com/documents/nr-reporting-summary-flat.pdf](https://www.nature.com/documents/nr-reporting-summary-flat.pdf)

## Life sciences study design

All studies must disclose on these points even when the disclosure is negative.

|                 |                                                                                                                                                                                                                                                                                                                                                                                                                                                                                                                                                                 |
|-----------------|-----------------------------------------------------------------------------------------------------------------------------------------------------------------------------------------------------------------------------------------------------------------------------------------------------------------------------------------------------------------------------------------------------------------------------------------------------------------------------------------------------------------------------------------------------------------|
| Sample size     | Samples are listed in Supplementary Data 1.                                                                                                                                                                                                                                                                                                                                                                                                                                                                                                                     |
| Data exclusions | We excluded low quality and off-target cells using criteria as described in the Methods.                                                                                                                                                                                                                                                                                                                                                                                                                                                                        |
| Replication     | We analyzed multiple organoids from multiple cell lines for each different time point in the time course and multiple organoids for the perturbation experiment. To replicate the finding in the perturbation experiment we generated two different GLI3-KO lines and a control line in the same editing experiment and performed the multiome and sc-RNAseq experiment on both cell lines comparing to the generated control line. The loss of dorsal telencephalon and a strong enrichment in the ventral telencephalon was shown in two independent batches. |
| Randomization   | Experiments were not randomized                                                                                                                                                                                                                                                                                                                                                                                                                                                                                                                                 |
| Blinding        | The organoids for the sc-RNAseq experiments of KO and WT organoids were performed in a blinded fashion. The organoids were chosen by a researcher not involved in the project. Investigators were not blinded during the other experiments.                                                                                                                                                                                                                                                                                                                     |

## Reporting for specific materials, systems and methods

We require information from authors about some types of materials, experimental systems and methods used in many studies. Here, indicate whether each material, system or method listed is relevant to your study. If you are not sure if a list item applies to your research, read the appropriate section before selecting a response.

### Materials & experimental systems

### Methods

| n/a                                 | Involved in the study                                     | n/a                                 | Involved in the study                              |
|-------------------------------------|-----------------------------------------------------------|-------------------------------------|----------------------------------------------------|
| <input type="checkbox"/>            | <input checked="" type="checkbox"/> Antibodies            | <input checked="" type="checkbox"/> | <input type="checkbox"/> ChIP-seq                  |
| <input type="checkbox"/>            | <input checked="" type="checkbox"/> Eukaryotic cell lines | <input type="checkbox"/>            | <input checked="" type="checkbox"/> Flow cytometry |
| <input checked="" type="checkbox"/> | <input type="checkbox"/> Palaeontology and archaeology    | <input checked="" type="checkbox"/> | <input type="checkbox"/> MRI-based neuroimaging    |
| <input checked="" type="checkbox"/> | <input type="checkbox"/> Animals and other organisms      |                                     |                                                    |
| <input checked="" type="checkbox"/> | <input type="checkbox"/> Human research participants      |                                     |                                                    |
| <input checked="" type="checkbox"/> | <input type="checkbox"/> Clinical data                    |                                     |                                                    |
| <input checked="" type="checkbox"/> | <input type="checkbox"/> Dual use research of concern     |                                     |                                                    |

## Antibodies

|                 |                                                                                                            |
|-----------------|------------------------------------------------------------------------------------------------------------|
| Antibodies used | See Methods, in the sections "Westernblot", "Immunohistochemistry" and "Bulk Cut&Tag for GLI3 and H3K27ac" |
| Validation      | See Methods, validations as provided by the manufacturer.                                                  |

## Eukaryotic cell lines

Policy information about [cell lines](#)

|                                                                      |                                                                                                                                                                                |
|----------------------------------------------------------------------|--------------------------------------------------------------------------------------------------------------------------------------------------------------------------------|
| Cell line source(s)                                                  | See Methods, in the section "Stem cell and organoid culture".                                                                                                                  |
| Authentication                                                       | See Methods, in the section "Stem cell and organoid culture". Cells were further authenticated based on single cell RNA-Seq reads compared to single nucleotide polymorphisms. |
| Mycoplasma contamination                                             | Cell lines were tested for mycoplasma contamination on a regular basis using a PCR-based test and were found to be negative for mycoplasma.                                    |
| Commonly misidentified lines<br>(See <a href="#">ICLAC</a> register) | None.                                                                                                                                                                          |

## Plots

Confirm that:

- The axis labels state the marker and fluorochrome used (e.g. CD4-FITC).
- The axis scales are clearly visible. Include numbers along axes only for bottom left plot of group (a 'group' is an analysis of identical markers).
- All plots are contour plots with outliers or pseudocolor plots.
- A numerical value for number of cells or percentage (with statistics) is provided.

## Methodology

Sample preparation

iPSC were brought into suspension with TrypLE and incubation of 3 min at RT. Cells were then resuspended in mTesr1 and spun down for 5 min 300g at 4 degrees. The pellet was resuspended in mTesR1 supplemented with 100 µg/ml Primocin and Y-27632 (final concentration 5µM). Cells were filtered through a 30µm mesh prior to sorting. Cells were collected in mTesR1 supplemented with 100 µg/ml Primocin and Y-27632 (final concentration 5µM) and plated on matrigel. Organoids were dissociated with the papain-based dissociation kit (Miltenyi Biotec, 130-092-628) prior to sorting as described in Methods, filtered through a 30µm mesh prior to sorting and cells were collected in PBS with 1% BSA.

Instrument

BD FACS Aria III and BD FACS Fusion

Software

FACS Diva

Cell population abundance

The final sorted population was around 11% of single cells for iPSC and 30% of single cells for two month organoid culture.

Gating strategy

See Extended Data Fig. 7c. Three gates were used 1) FSC-A vs SSC were used to gate for the bulk population of cells, 2) FSC-A vs FSH-H was used to minimize doublet sorting, 3) GFP+ populations were determined and gated by comparing to GFP negative controls.

- Tick this box to confirm that a figure exemplifying the gating strategy is provided in the Supplementary Information.
